# Supplementary material for: Clinical Presentation and Outcomes of Acute Pericarditis in a Large Urban Hospital in the United States of America
Source: PubMed Central journal article supplement (PMC7768931; doi:10.1016/j.chest.2020.07.039), 2020-07-24

## Clinical Presentation and Outcomes of Acute Pericarditis in a Large Urban Hospital in the United States of America

*Alessandra Vecchié, MD; Juan G. Chiabrando, MD; Megan S. Dell, BSBME;  
Aldo Bonaventura, MD; Adolfo G. Mauro, PhD; George Wohlford, PharmD;  
Benjamin W. Van Tassell, PharmD; Daniel H. Berrocal, MD, PhD;  
Fabrizio Montecucco, MD, PhD; Anna Beutler, MD; John F. Paolini, MD, PhD;  
Tamas S. Gal, PhD; and Antonio Abbate, MD, PhD*

CHEST 2020; 158(6):2556-2567

*Online supplements are not copyedited prior to posting and the author(s) take full responsibility for the accuracy of all data.*

© 2020 AMERICAN COLLEGE OF CHEST PHYSICIANS. Reproduction of this article is prohibited without written permission from the American College of Chest Physicians. See online for more details. DOI: 10.1016/j.chest.2020.07.039

**e-Table 1.** Characteristics of patients according to availability of troponin I determination.

|                                     | Patients without troponin I determination (n=73) | Patients with troponin I determination (n=167) | p-value         |
|-------------------------------------|--------------------------------------------------|------------------------------------------------|-----------------|
| <b>Demographics Characteristics</b> |                                                  |                                                |                 |
| Male sex                            | 37 (50.7)                                        | 98 (58.7)                                      | .261            |
| Age, years                          | 56 [35.0-68.5]                                   | 50 [33.0-61.0]                                 | .173            |
| Race                                |                                                  |                                                |                 |
| Caucasian                           | 49 (67.1)                                        | 72 (43.1)                                      |                 |
| Black or African-American           | 14 (19.2)                                        | 86 (51.5)                                      | <b>&lt;.001</b> |
| Other                               | 10 (13.6)                                        | 9 (5.4)                                        |                 |
| <b>Medical History</b>              |                                                  |                                                |                 |
| Hypertension                        | 33 (45.2)                                        | 93 (55.7)                                      | .160            |
| Diabetes                            | 13 (17.8)                                        | 38 (22.8)                                      | .493            |
| Dyslipidemia                        | 26 (35.6)                                        | 53 (31.7)                                      | .554            |
| Coronary artery disease             | 13 (17.8)                                        | 39 (23.4)                                      | .396            |
| Chronic heart failure               | 17 (23.3)                                        | 34 (20.4)                                      | .611            |
| Stroke/TIA                          | 5 (6.8)                                          | 8 (4.8)                                        | .542            |
| Atrial fibrillation                 | 34 (46.6)                                        | 29 (17.4)                                      | <b>&lt;.001</b> |
| Myocardial infarction               | 5 (6.8)                                          | 28 (16.8)                                      | <b>.043</b>     |
| Active smokers                      | 10 (13.7)                                        | 67 (40.4)                                      | <b>&lt;.001</b> |
| Autoimmune diseases                 | 6(8.2)                                           | 18 (10.8)                                      | .645            |
| Tuberculosis                        | 0                                                | 2 (1.2)                                        | 1.000           |
| Chest radiation                     | 1 (1.4)                                          | 7 (4.2)                                        | .441            |
| Neoplastic diseases                 | 5 (6.8)                                          | 25 (15.0)                                      | .092            |
| Severe chronic kidney disease       | 17 (23.3)                                        | 27 (16.3)                                      | .208            |
| Chest trauma                        | 2 (2.7)                                          | 4 (2.4)                                        | 1.000           |
| Recent cardiac procedure            |                                                  |                                                |                 |
| Percutaneous coronary intervention  | 1 (1.4)                                          | 6 (3.6)                                        |                 |
| Pacemaker/Cardiac ablation          | 19 (26.0)                                        | 5 (3.0)                                        | <b>&lt;.001</b> |
| Cardiac Surgery                     | 7 (9.6)                                          | 12 (7.2)                                       |                 |
| <b>Therapies</b>                    |                                                  |                                                |                 |
| Immunosuppression                   | 4 (5.6)                                          | 11 (6.6)                                       | 1.000           |
| High dose corticosteroids           | 28 (38.4)                                        | 98 (58.7)                                      | .131            |
| Oral anticoagulation                | 11 (15.5)                                        | 16 (9.6)                                       | .189            |
| <b>Etiology</b>                     |                                                  |                                                |                 |
| Idiopathic                          | 28 (38.4)                                        | 98 (58.7)                                      |                 |
| Post-cardiac injury                 | 41 (56.2)                                        | 38 (22.8)                                      | <b>&lt;.001</b> |
| Other                               | 4 (5.6)                                          | 31 (18.6)                                      |                 |
| <b>Clinical Presentation</b>        |                                                  |                                                |                 |
| Fever                               | 3 (4.4)                                          | 18 (10.8)                                      | .137            |
| Subacute presentation               | 4 (5.6)                                          | 8 (4.8)                                        | .754            |
| Trauma                              | 6 (8.5)                                          | 3 (1.8)                                        | <b>.022</b>     |
| Severe pericardial effusion         | 20 (28.2)                                        | 29 (17.4)                                      | .079            |
| Heart failure                       | 11 (15.5)                                        | 32 (19.2)                                      | .583            |
| Chest pain                          | 62 (89.9)                                        | 158 (94.6)                                     | .253            |
| <b>Cardiac Exam</b>                 |                                                  |                                                |                 |
| Pericardial rub                     | 12 (17.9)                                        | 31 (18.8)                                      | 1.000           |
| Pulsus paradoxus                    | 2 (3.0)                                          | 8 (4.8)                                        | .728            |
| Kussmaul sign                       | 1 (1.5)                                          | 3 (1.8)                                        | 1.000           |

| <b>EKG</b>                         |                    |                   |                 |
|------------------------------------|--------------------|-------------------|-----------------|
| PR depression                      | 8 (12.3)           | 63 (38.2)         | <b>&lt;.001</b> |
| ST elevation                       | 19 (29.2)          | 85 (51.5)         | <b>.003</b>     |
| T wave inversion                   | 18 (27.7)          | 40 (24.2)         | .615            |
| <b>Laboratory</b>                  |                    |                   |                 |
| WBC, n x10 <sup>3</sup> /mL        | 8.6 [6.70-12.0]    | 9.6 [6.70-12.3]   | .664            |
| Hgb, g/dL                          | 12.1 [10.55-13.50] | 12.1 [10.4 -13.7] | .658            |
| Platelets, n x10 <sup>3</sup> /mL  | 238 [179-342]      | 242 [10.4-13.7]   | .964            |
| Creatinine, mg/dL                  | 0.83 [0.69-0.967]  | 0.93 [0.73-1.18]  | <b>.029</b>     |
| CRP, mg/L                          | 0.8 [0 -3.6]       | 11.1 [2.05-18.9]  | <b>.008</b>     |
| ESR, mm/h                          | 25 [3-72]          | 56 [29.5-92.75]   | .161            |
| <b>Treatment at Presentation</b>   |                    |                   |                 |
| NSAIDs                             | 44 (61.1)          | 125 (74.9)        | <b>.044</b>     |
| Colchicine                         | 45 (62.5)          | 107 (64.1)        | .884            |
| Glucocorticoids                    | 12 (16.9)          | 17 (10.2)         | .193            |
| <b>Surgical Procedure</b>          |                    |                   |                 |
| Pericardiectomy                    | 5 (6.9)            | 3 (1.8)           |                 |
| Pericardial window                 | 2 (2.8)            | 5 (3.0)           | <b>.002</b>     |
| Pericardiocentesis                 | 15 (20.8)          | 12 (7.2)          |                 |
| <b>Outcomes</b>                    |                    |                   |                 |
| Composite outcome*                 | 33 (45.2)          | 29 (29.3)         | <b>.019</b>     |
| Failure of treatment               | 8 (11.4)           | 9 (5.4)           | .107            |
| Recurrent pericarditis             | 15 (20.5)          | 22 (13.2)         | .174            |
| Cardiac tamponade                  | 13 (17.8)          | 18 (10.8)         | .148            |
| Constrictive pericarditis          | 6 (8.2)            | 3 (1.8)           | <b>.025</b>     |
| Death                              | 2 (2.7)            | 7 (4.2)           | .726            |
| Rehospitalization due to any cause | 29 (39.8)          | 61 (35.9)         | .740            |

\*Composite endpoint defined as the presence of any of the following: failure of treatment, recurrences, cardiac tamponade, constrictive pericarditis or death

The data are presented as a number and (%) of all cases or as median and [interquartile range]. P-values were calculated by Mann-Whitney U test or Fisher's exact test or c<sup>2</sup> test, as appropriate. Statistical significant values are presented in bold character.

Abbreviations: CRP= C-reactive protein; EKG= electrocardiogram; ESR= erythro-sedimentation rate; Hgb= hemoglobin; NSAIDs= nonsteroidal anti-inflammatory drug; TIA= transient ischemic attack; WBC= white blood cells.

**e-Table 2.** Logistic regression model for the prediction of the composite outcome.

| Composite adverse outcome       | Unadjusted                 |                  | Adjusted                    |              |
|---------------------------------|----------------------------|------------------|-----------------------------|--------------|
|                                 | OR (95% CI)                | p-value          | OR (95% CI)                 | p-value      |
| Age                             | 1.000 (0.986-1.015)        | 0.965            |                             |              |
| <b>Sex</b>                      | <b>1.583 (0.925-2.710)</b> | <b>0.094</b>     | 1.111 (0.512-2.410)         | 0.789        |
| BMI                             | 1.004 (0.968-1.042)        | 0.822            |                             |              |
| Ethnicity                       | 0.839 (0.195-3.604)        | 0.813            |                             |              |
| Race                            | 1.047 (0.730-1.501)        | 0.804            |                             |              |
| Etiological classification      | 0.914 (0.804-1.040)        | 0.173            |                             |              |
| CHF                             | 1.187 (0.624-2.259)        | 0.601            |                             |              |
| <b>MI (history of)</b>          | <b>0.383 (0.151-0.970)</b> | <b>0.043</b>     | 0.666 (0.201-2.161)         | 0.492        |
| Chest radiation                 | 1.162 (0.271-4.988)        | 0.840            |                             |              |
| <b>Subacute onset</b>           | <b>10.69 (2.28-50.07)</b>  | <b>0.003</b>     | <b>15.02 (1.852-122.11)</b> | <b>0.013</b> |
| Immunosuppression               | 1.289 (0.443-3.757)        | 0.641            |                             |              |
| High dose corticosteroids       | 2.468 (0.644-9.453)        | 0.187            |                             |              |
| <b>Oral anticoagulation</b>     | <b>0.209 (0.061-0.716)</b> | <b>0.013</b>     | 0.162 (0.020-1.334)         | 0.091        |
| Heart failure at onset          | 1.158 (0.583-2.300)        | 0.675            |                             |              |
| ESR                             | 1.007 (0.996-1.018)        | 0.209            |                             |              |
| CRP                             | 1.039 (0.989-1.092)        | 0.124            |                             |              |
| <b>Troponin &gt; 0.20 ng/mL</b> | <b>0.272 (0.107-0.693)</b> | <b>0.006</b>     | <b>0.333 (0.119-0.933)</b>  | <b>0.035</b> |
| WBC                             | 1.019 (0.960-1.081)        | 0.537            |                             |              |
| <b>Hb</b>                       | <b>0.794 (0.700-0.901)</b> | <b>&lt;0.001</b> | <b>0.753 (0.640-0.883)</b>  | <b>0.001</b> |
| NSAIDS                          | 0.685 (0.384-1.222)        | 0.200            |                             |              |
| <b>Colchicine</b>               | <b>0.509 (0.293-0.883)</b> | <b>0.016</b>     | 0.911 (0.418-1.987)         | 0.815        |
| Glucocorticoids                 | 1.722 (0.784-3.784)        | 0.176            |                             |              |

Analysis performed for the composite endpoint defined as the presence of any of the following: failure of treatment, recurrences, cardiac tamponade, constrictive pericarditis or death. Statistical significant values are presented in bold character.

Abbreviations: CI: confidence interval; OR: odd ratio.

**e-Table 3.** Characteristics of the cohort comparing idiopathic and post-cardiac injury etiologies.

|                                    | <b>Idiopathic pericarditis (n=126)</b> | <b>Post-cardiac injury pericarditis (n=79)</b> | <b>p-value</b>  |
|------------------------------------|----------------------------------------|------------------------------------------------|-----------------|
| <b>Demographic Characteristics</b> |                                        |                                                |                 |
| Male sex                           | 68 (54.0)                              | 46 (58.2)                                      | .567            |
| Age, years                         | 48 [34-58]                             | 61 [50-71]                                     | <b>&lt;.001</b> |
| Race                               |                                        |                                                |                 |
| Caucasian                          | 49 (38.9)                              | 55 (69.6)                                      |                 |
| African American                   | 70 (55.6)                              | 14 (17.7)                                      | <b>&lt;.001</b> |
| Other                              | 7 (5.6)                                | 10 (12.7)                                      |                 |
| <b>Medical History</b>             |                                        |                                                |                 |
| Hypertension                       | 64 (50.8)                              | 46 (58.2)                                      | .250            |
| Diabetes                           | 21 (16.7)                              | 27 (34.2)                                      | <b>.006</b>     |
| Dyslipidemia                       | 35 (27.8)                              | 37 (46.8)                                      | <b>.007</b>     |
| Coronary artery disease            | 17 (13.5)                              | 33 (41.8)                                      | <b>&lt;.001</b> |
| Congestive heart failure           | 15 (11.9)                              | 28 (35.4)                                      | <b>&lt;.001</b> |
| Stroke/TIA*                        | 5 (4.0)                                | 7 (8.9)                                        | .220            |
| Atrial fibrillation                | 12 (9.5)                               | 48 (60.8)                                      | <b>&lt;.001</b> |
| Myocardial infarction              | 7 (5.6)                                | 22 (27.8)                                      | <b>&lt;.001</b> |
| Oral anticoagulation               | 4 (3.2)                                | 19 (24.1)                                      | <b>&lt;.001</b> |
| <b>Clinical Presentation</b>       |                                        |                                                |                 |
| Subacute presentation              |                                        |                                                | .158            |
| Severe pericardial effusion        | 23 (18.3)                              | 17 (21.5)                                      | .718            |
| Heart failure                      | 13 (10.3)                              | 20 (25.3)                                      | <b>.006</b>     |
| Chest pain                         | 116 (92.1)                             | 72 (91.1)                                      | .379            |
| Fever                              | 12 (9.5)                               | 1 (1.3)                                        | <b>.017</b>     |
| <b>Laboratory</b>                  |                                        |                                                |                 |
| Troponin >0.20 ng/mL               | 9 (7.1)                                | 22 (27.8)                                      | <b>&lt;.001</b> |
| <b>Outcomes</b>                    |                                        |                                                |                 |
| Composite outcome*                 | 48 (38.1)                              | 20 (25.3)                                      | .067            |
| Failure of treatment               | 13 (10.3)                              | 2 (2.5)                                        | .051            |
| Recurrent pericarditis             | 26 (20.6)                              | 9 (11.4)                                       | .126            |
| Cardiac tamponade                  | 13 (10.3)                              | 9 (11.4)                                       | .821            |
| Constrictive pericarditis          | 7 (5.6)                                | 1 (1.3)                                        | .155            |
| Death                              | 5 (4.0)                                | 2 (2.5)                                        | .575            |
| Failure or recurrences             | 33 (26.2)                              | 10 (12.7)                                      | <b>.022</b>     |
| Rehospitalization due to any cause | 47 (37.3)                              | 33 (41.8)                                      | .532            |

\*Composite endpoint defined as the presence of any of the following: failure of treatment, recurrences, cardiac tamponade, constrictive pericarditis or death

The data are presented as a number and (%) of all cases or as median and [interquartile range]. P-values were calculated by Mann-Whitney U test or Fisher's exact test or  $\chi^2$  test, as appropriate. Statistical significant values are presented in bold character.

Abbreviations: TIA= transient ischemic attack.

**e-Table 4.** Characteristics of patients with abnormal serum troponin I levels ( $\geq 0.20$  ng/mL ).

|                                    | Troponin I < 0.20<br>ng/mL ng/ml (n=115) | Troponin I $\geq 0.20$<br>ng/mL (n=52) | p-value         |
|------------------------------------|------------------------------------------|----------------------------------------|-----------------|
| <b>Demographic Characteristics</b> |                                          |                                        |                 |
| Male sex                           | 70 (57.9)                                | 28 (60.9)                              | .861            |
| Age, years                         | 50 [36-60]                               | 52 [31-62]                             | .920            |
| Race                               |                                          |                                        |                 |
| Caucasian                          | 50 (41.3)                                | 22 (47.8)                              |                 |
| African American                   | 66 (54.5)                                | 20 (43.5)                              | .076            |
| Other                              | 5 (4.2)                                  | 4 (8.7)                                |                 |
| <b>Medical History</b>             |                                          |                                        |                 |
| Hypertension                       | 65 (53.7)                                | 28 (60.9)                              | .486            |
| Diabetes                           | 28 (23.1)                                | 10 (21.7)                              | 1.000           |
| Dyslipidemia                       | 40 (33.1)                                | 13 (28.3)                              | .583            |
| Coronary artery disease            | 21 (17.4)                                | 18 (39.1)                              | <b>.004</b>     |
| Heart failure                      | 20 (16.5)                                | 14 (30.4)                              | .055            |
| Stroke/TIA*                        | 3 (2.5)                                  | 5 (10.9)                               | <b>.037</b>     |
| Atrial fibrillation                | 17 (14)                                  | 12 (26.1)                              | .107            |
| Myocardial infarction              | 11 (9.1)                                 | 17 (37)                                | <b>&lt;.001</b> |
| Recent cardiac procedure           |                                          |                                        |                 |
| Percutaneous coronary intervention | 1 (0.8)                                  | 5 (10.9)                               |                 |
| Pacemaker/cardiac ablation         | 3 (2.5)                                  | 2 (4.3)                                | <b>.007</b>     |
| Cardiac surgery                    | 7 (5.8)                                  | 5 (10.9)                               |                 |
| <b>Therapies</b>                   |                                          |                                        |                 |
| Immunosuppression                  | 7 (5.8)                                  | 4 (8.7)                                | .497            |
| High dose corticosteroids          | 4 (3.3)                                  | -                                      | .576            |
| Oral anticoagulation               | 9 (7.4)                                  | 7 (15.2)                               | .145            |
| <b>Clinical Presentation</b>       |                                          |                                        |                 |
| Subacute presentation              | 8 (6.6)                                  | -                                      | .108            |
| Trauma                             | 2 (1.7)                                  | 1 (2.2)                                | .576            |
| Heart failure                      | 18 (14.9)                                | 14 (30.4)                              | <b>.028</b>     |
| Severe pericardial effusion        | 24 (19.8)                                | 5 (10.9)                               | .252            |
| <b>Outcomes</b>                    |                                          |                                        |                 |
| Composite outcome *                | 43 (35.5)                                | 6 (13)                                 | <b>.004</b>     |
| Failure to treat                   | 9 (7.4)                                  | -                                      | .064            |
| Recurrent pericarditis             | 20 (16.5)                                | 2 (4.3)                                | <b>.041</b>     |
| Cardiac tamponade                  | 16 (13.2)                                | 2 (4.3)                                | .160            |
| Constrictive pericarditis          | 2 (1.7)                                  | 1 (2.2)                                | 1.000           |
| Death                              | 5 (4.2)                                  | 2 (4.3)                                | 1.000           |
| Rehospitalization for any causes   | 44 (35.8)                                | 18 (39.1)                              | .124            |

\*Composite endpoint defined as the presence of any of the following: failure of treatment, recurrences, cardiac tamponade, constrictive pericarditis or death

The data are presented as a number and (%) of all cases or as median and [interquartile range]. P-values were calculated by Mann-Whitney U test or Fisher's exact test or  $\chi^2$  test, as appropriate. Statistical significant values are presented in bold character.

Abbreviations: TIA= transient ischemic attack.

**e-Figure 1. CONSORT diagram.**

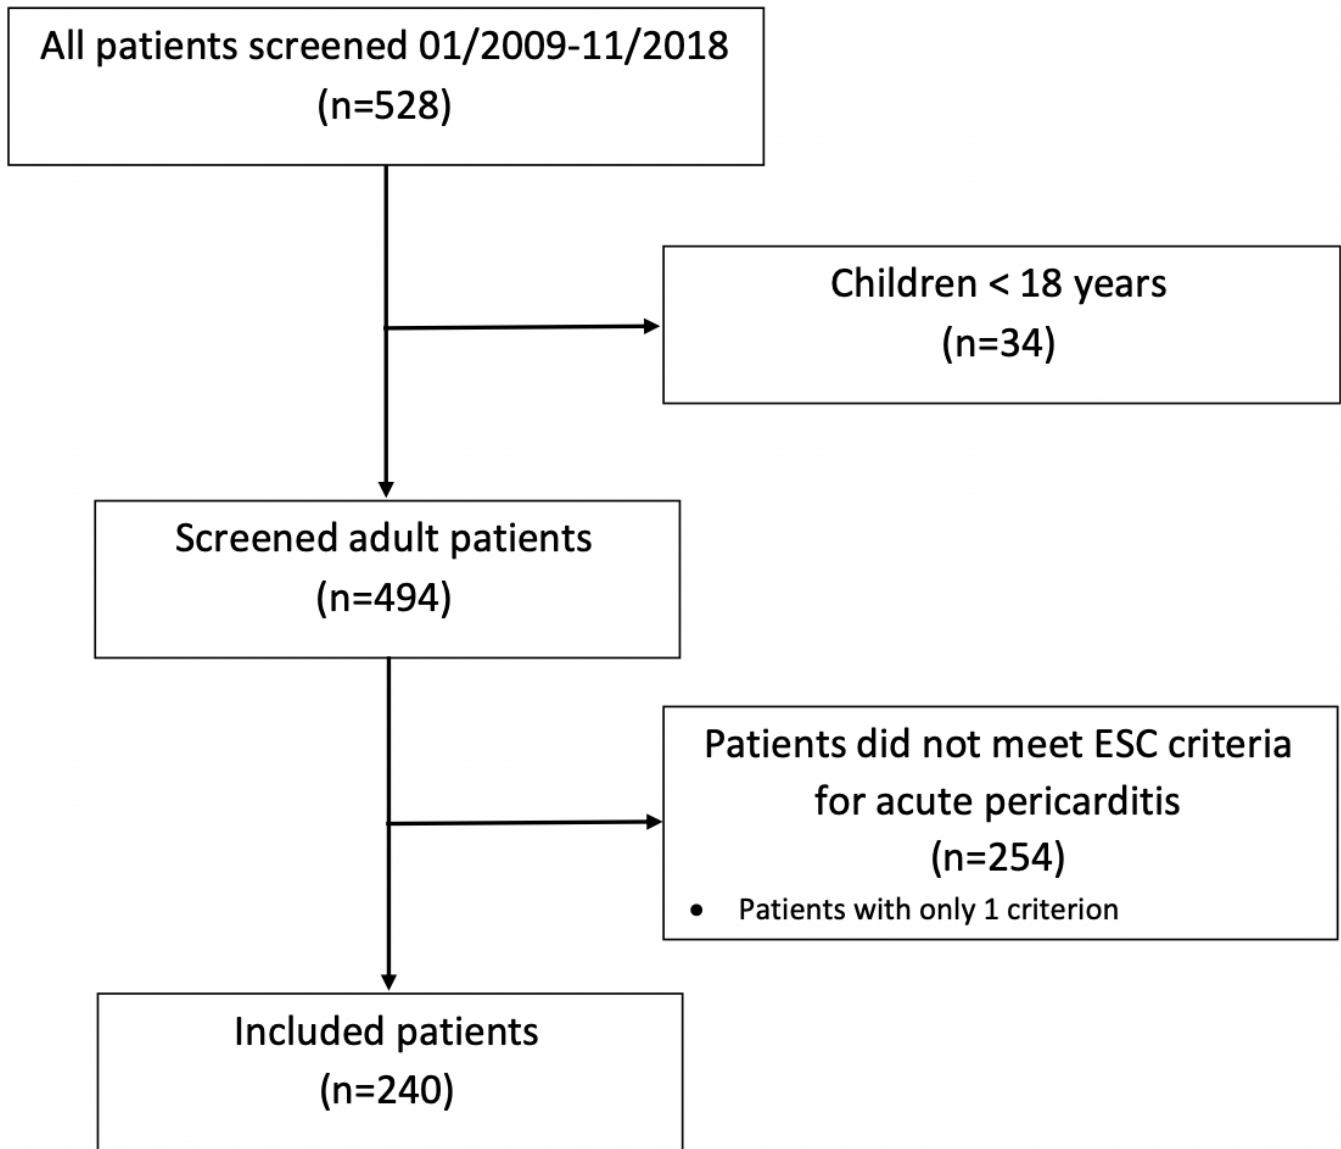

Supplement: mmc1.pdf [file mmc1.pdf]
